# Supplementary material for: Effect of peptide length on the conjugation to the gold nanoparticle surface: a molecular dynamic study
Source: PubMed Central journal article supplement (PMC4312466; doi:10.1186/s40199-014-0085-2), 2015-01-29
Supplement: 40199_2014_85_MOESM1_ESM.pdf [file 40199_2014_85_MOESM1_ESM.pdf]

## Supporting information

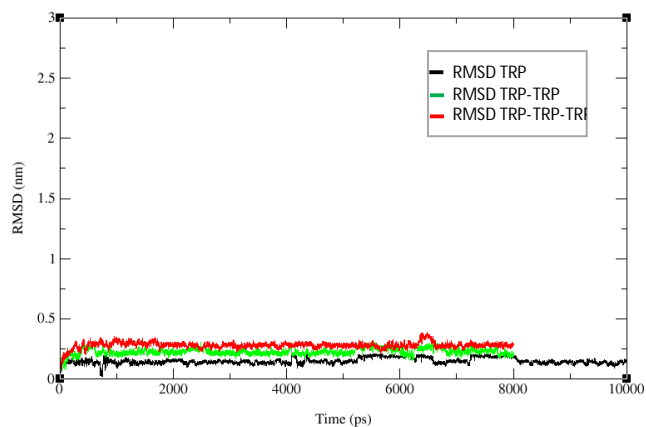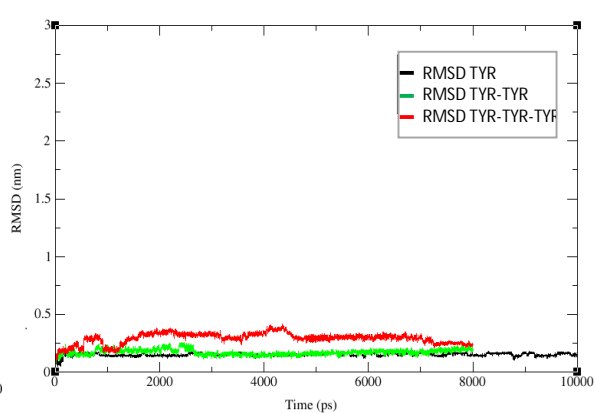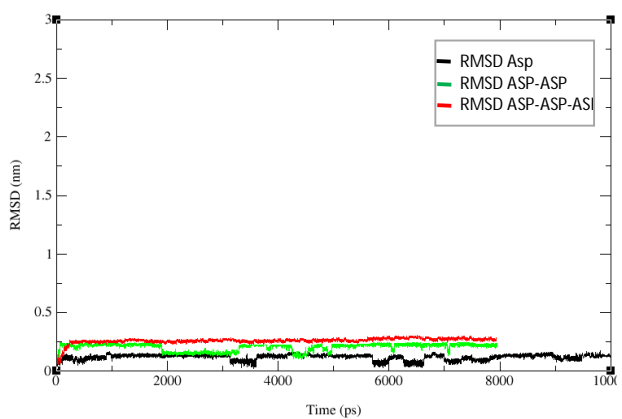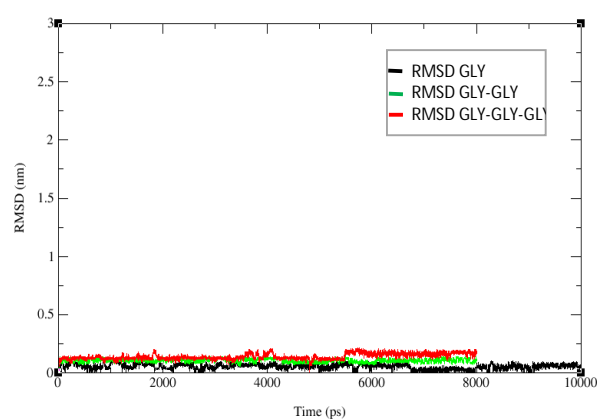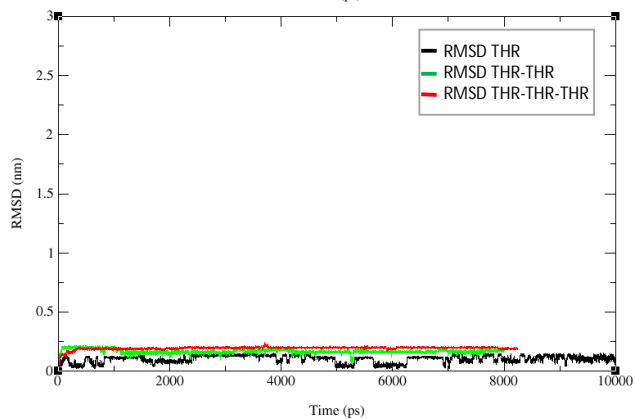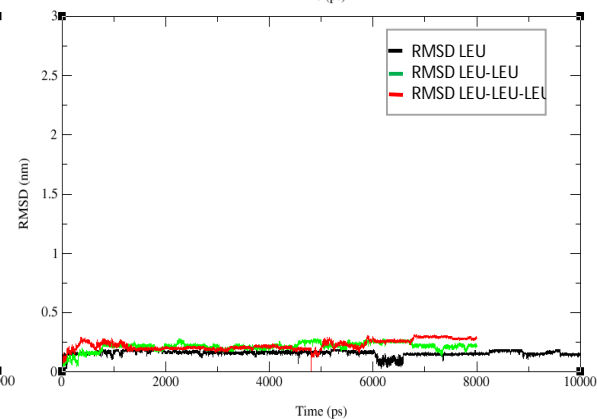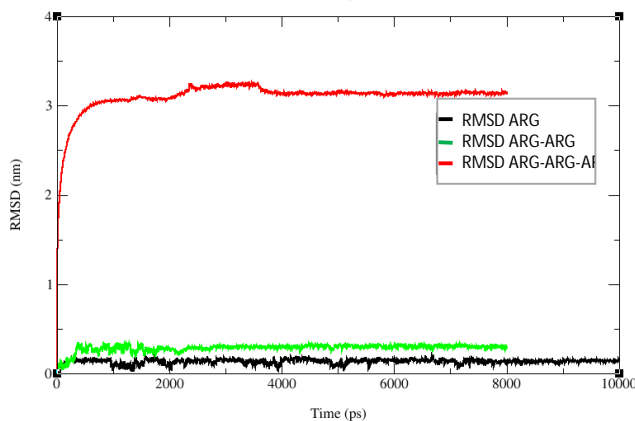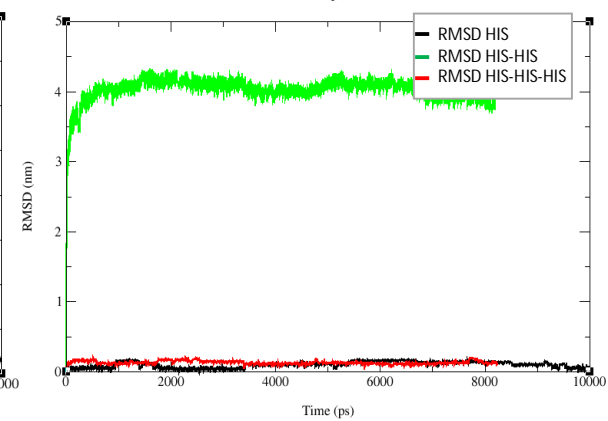

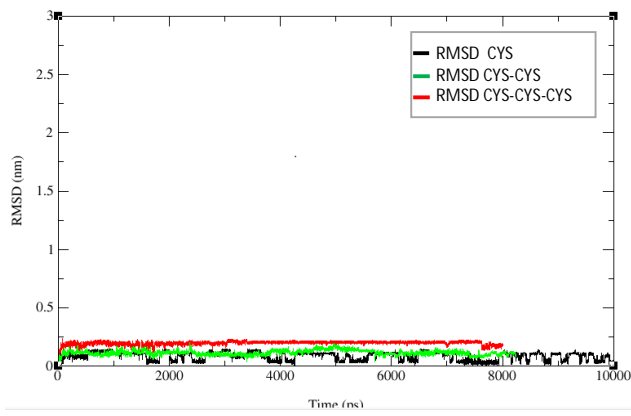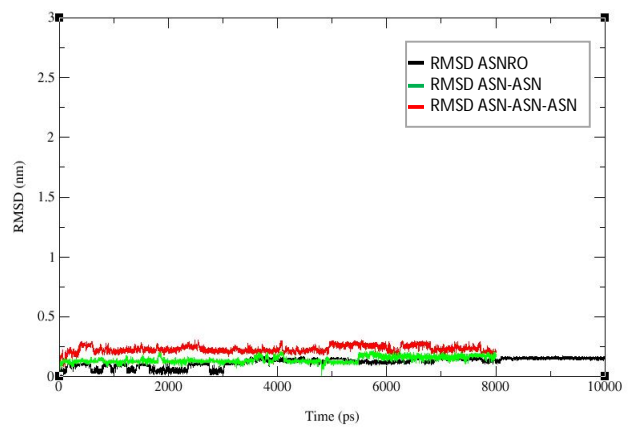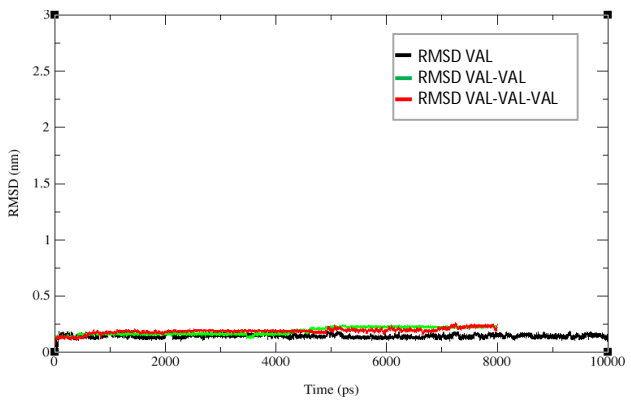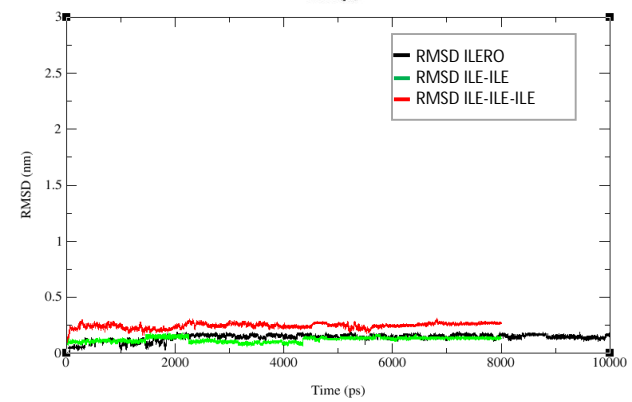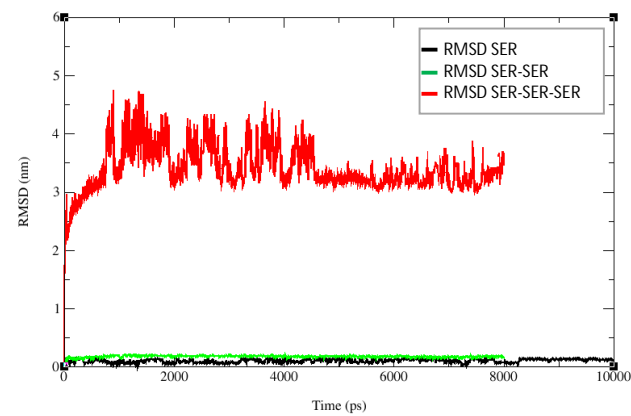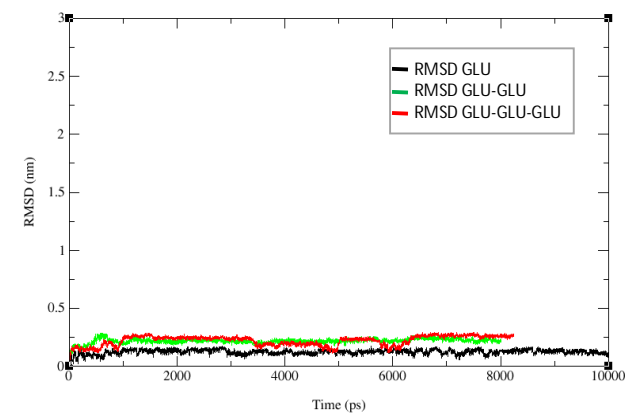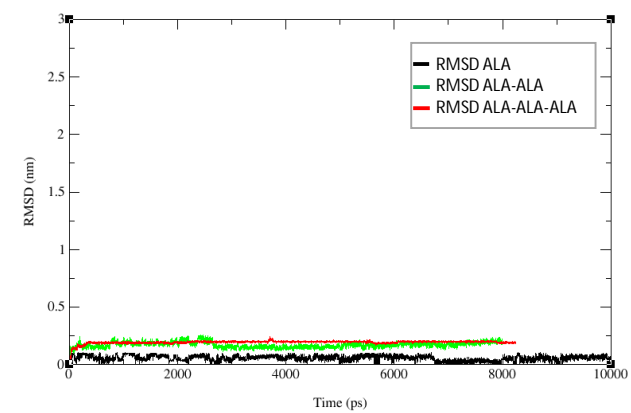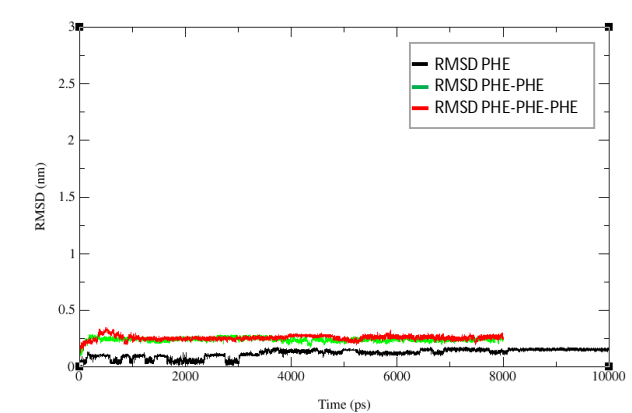

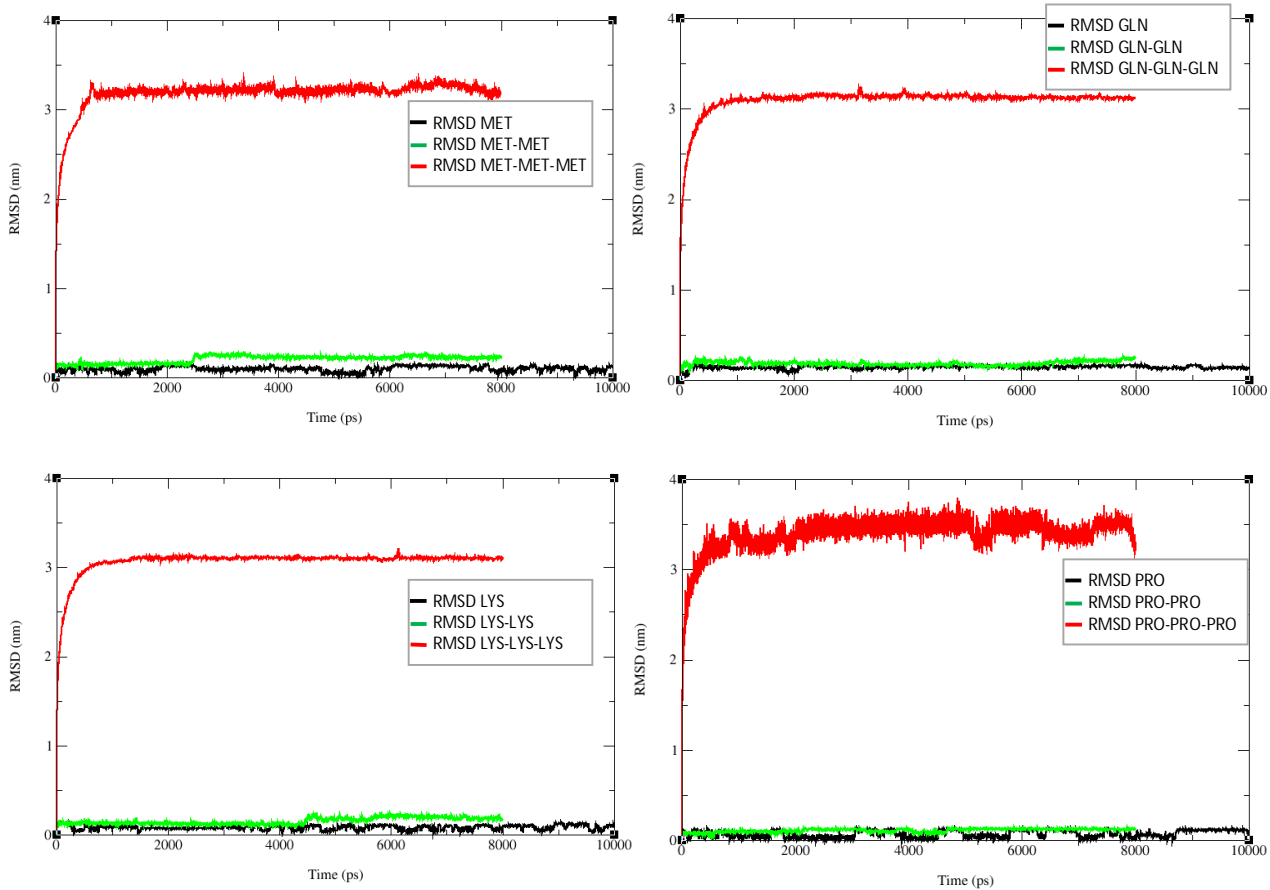

Figure1. This figure shows RMSDs of peptides. Amino acids are black, di-peptides are shown green and homotripeptides are shown by red line. Respectively from up-left to right are Trp,Tyr, Asp, Gly, Thr, Leu, Arg, His, Cys, Asn, Val, Ile, Ser, Glu, Ala,Phe, Met, Gln, Lys, Pro.

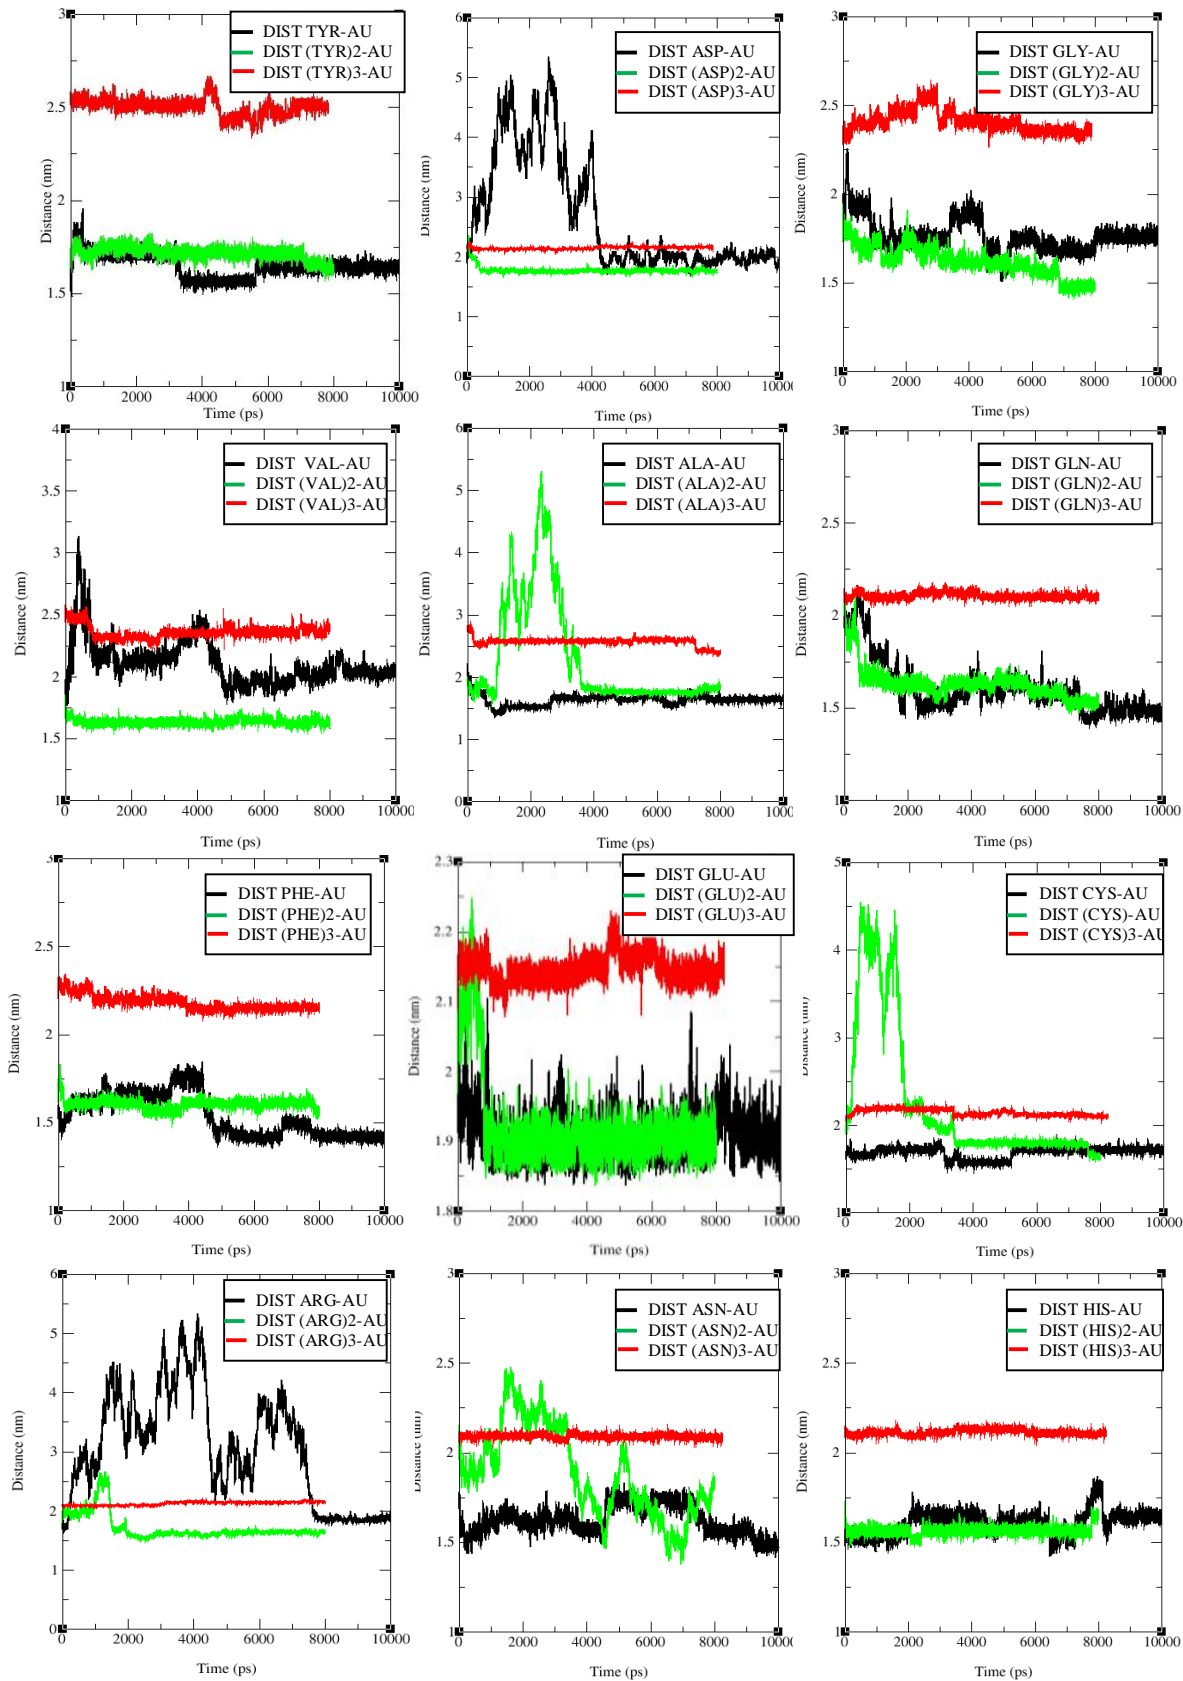

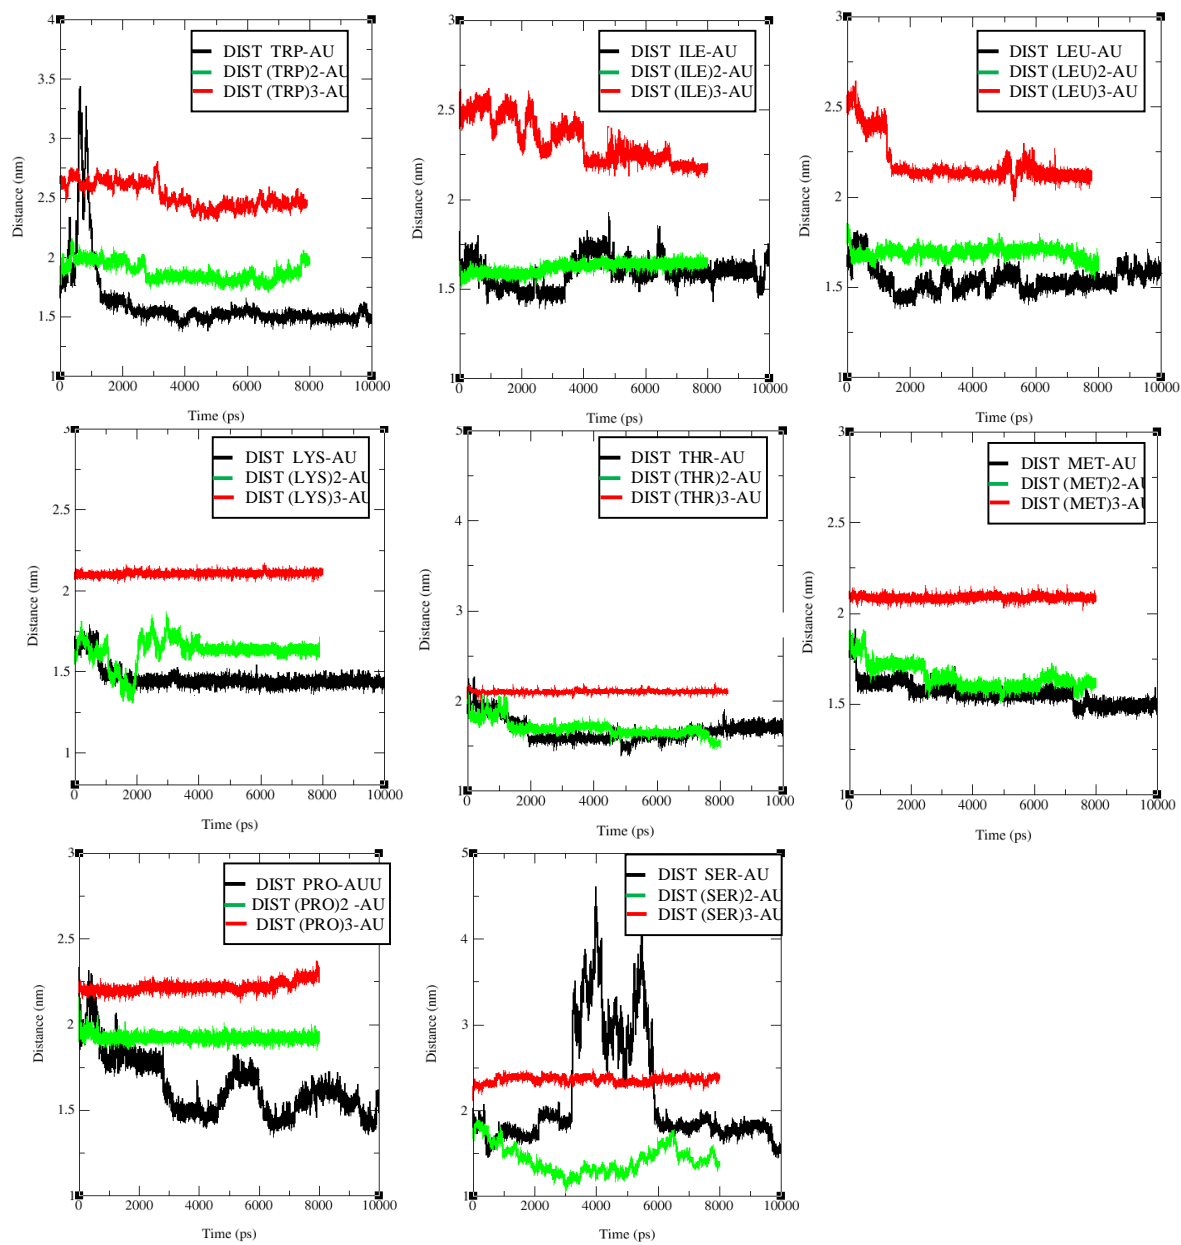

Figure 2. Distance of mono-amino acids (black), dipeptides (green), tripeptides (red) from GNP.
